# Supplementary material for: Molecular and Immunological Characterization of Ragweed (Ambrosia artemisiifolia L.) Pollen after Exposure of the Plants to Elevated Ozone over a Whole Growing Season
Source: PubMed Central journal article supplement (PMC3630196; doi:10.1371/journal.pone.0061518), 2013-04-18
Supplement: pone.0061518.s005.pdf [file pone.0061518.s005.pdf]

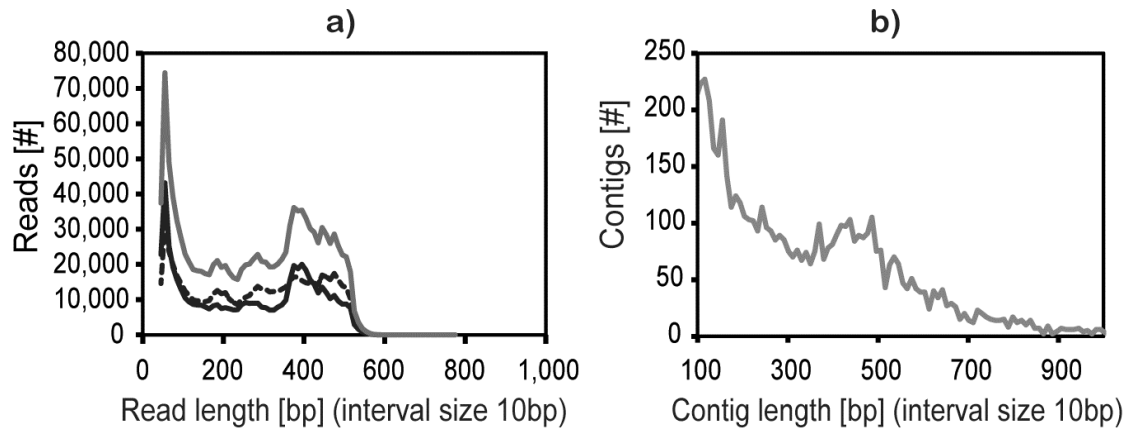

**Figure S5. (a)** Distribution of the length of the original 454-reads. **(b)** Sequence length distribution of contigs assembled with Newbler 2.5, removing contigs with sequence length <100 bp; (— = ozone.454-reads, - - = control.454-reads, ··· = ensemble)
