# Supplementary material for: Molecular and Immunological Characterization of Ragweed (Ambrosia artemisiifolia L.) Pollen after Exposure of the Plants to Elevated Ozone over a Whole Growing Season
Source: PubMed Central journal article supplement (PMC3630196; doi:10.1371/journal.pone.0061518), 2013-04-18
Supplement: pone.0061518.s006.pdf [file pone.0061518.s006.pdf]

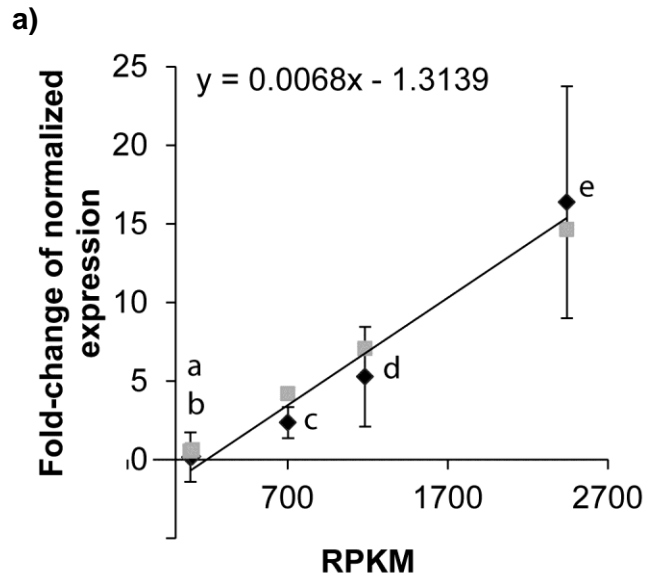

b)

| Representative isoform | Corresponding dot in figure | Name          | Sequence                 |
|------------------------|-----------------------------|---------------|--------------------------|
| Isotig01227            |                             | Tubulin Fwd   | TGCAGAGGGCTGTTTGCATGA    |
| Isotig01227            |                             | Tubulin Rev   | ACCCACGTACCAGTGAACAAAAG  |
| Isotig02972            | a                           | Art v 2 Fwd   | GGCTGATCAAAGGAAGGACTGCAA |
| Isotig02972            | a                           | Art v 2 Rev   | TGCACCGCGTATGAACCATTGA   |
| Isotig03100            | b                           | Amb a 10 Fwd  | GACGAGCTATTCGCCATCCTGAAA |
| Isotig03100            | b                           | Amb a 10 Rev  | GCTAATGAAACCATCGCCATCTGC |
| Contig32361            | c                           | Amba 8.2 Fwd  | GAATTCGATGCAGCTGGTACCCTT |
| Contig32361            | c                           | Amb a 8.2 Rev | GGGCTCTTCGTAATGCCAAACAC  |
| Isotig03734            | d                           | Clathrin Fwd  | AGGCGTTCATTCGCGCTTACTA   |
| Isotig03734            | d                           | Clathrin Rev  | ATCCTGGAGATCCTGCAACCAAAC |
| Isotig02293            | e                           | 02293 Fwd     | AGCTCACTTGGATGCTCACCTTCT |
| Isotig02293            | e                           | 02293 Rev     | CCATGGGCAAGGTGGAAGTTGTA  |

**Figure S6.** Comparison of high and low expressed transcripts, qRT-PCR vs. RPKM. **a)** Fold-change of tubulin normalized expression data are plotted against high and low RPKM-values of transcripts from control plants (black) (n=3). RPKM-values normalized to tubulin are shown in grey. Pearson-correlation  $r = 0.984$ . **b)** Corresponding isoforms with primer sequences are indicated.
