# Supplementary material for: Molecular and Immunological Characterization of Ragweed (Ambrosia artemisiifolia L.) Pollen after Exposure of the Plants to Elevated Ozone over a Whole Growing Season
Source: PubMed Central journal article supplement (PMC3630196; doi:10.1371/journal.pone.0061518), 2013-04-18
Supplement: pone.0061518.s007.pdf [file pone.0061518.s007.pdf]

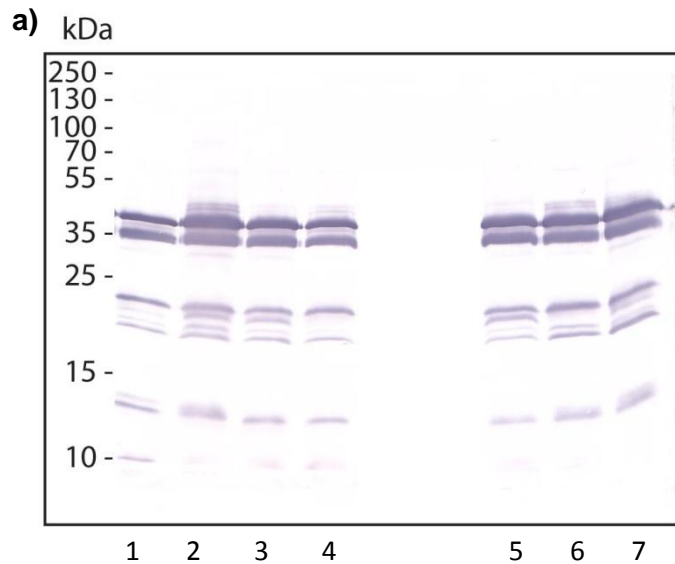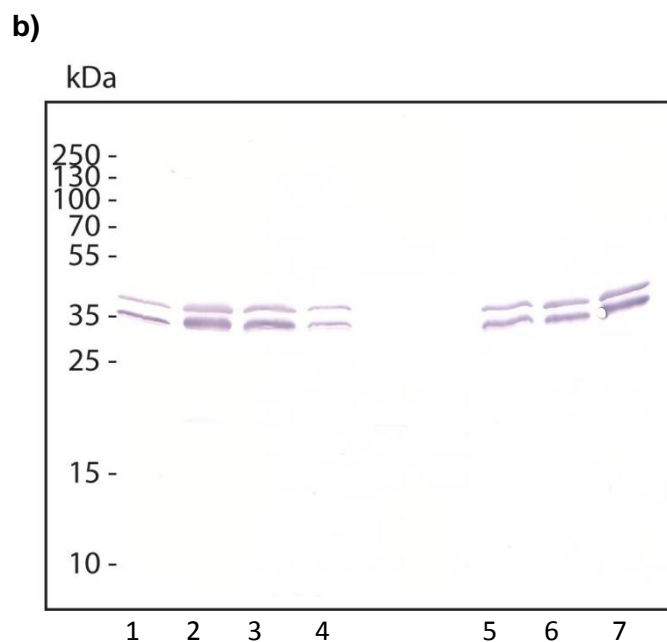

**Figure S7.** Representative immunoblot of expression of Amb a 1 allergen in crude *Ambrosia* pollen extracts. 1: Allergon extract, 2: ozone (120 ppb), 3: control, 4: ozone (120 ppb), 5: control, 6: ozone (80 ppb), 7: control. 10 µg of total protein per lane. Proteins were separated on a SDS-PAGE, electroblotted onto nitrocellulose membranes. After incubation with specific 1<sup>st</sup> antibodies, bound antibodies were detected with alkaline phosphatase-conjugated to goat anti rabbit IgG and rabbit anti mouse IgG, IgM, respectively. Labelling was detected using the NBT/bromo-chloro-indolyl phosphate substrate. **a)** 1<sup>st</sup> AB: polyclonal rabbit anti Amb a 1 serum, 2<sup>nd</sup> AB: AP-conjugated goat anti rabbit IgG. **b)** 1<sup>st</sup> AB: murine mAB anti Amb a 1 A39, 2<sup>nd</sup> AB: AP-conjugated rabbit anti mouse IgG, IgM.
